# Supplementary material
Source: PubMed Central journal article supplement (PMC7831997)
Supplement: mmc1.pdf [file mmc1.pdf]

(i)

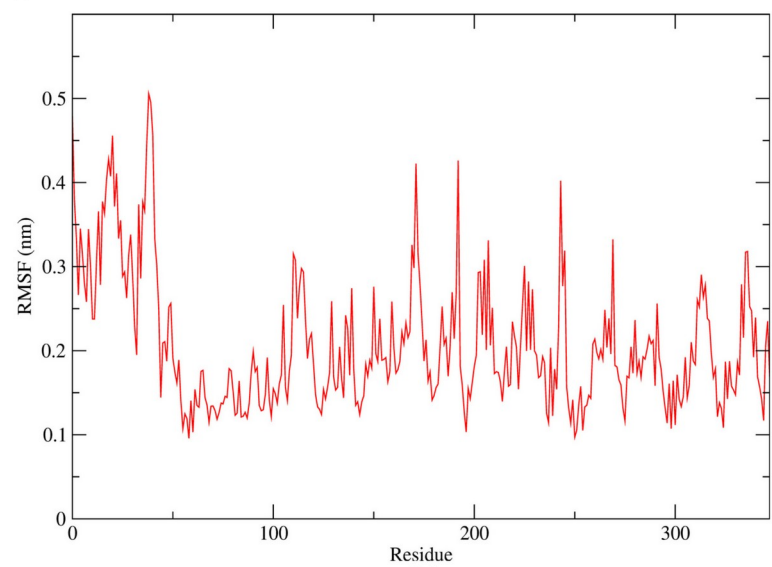

(ii)

(ii)

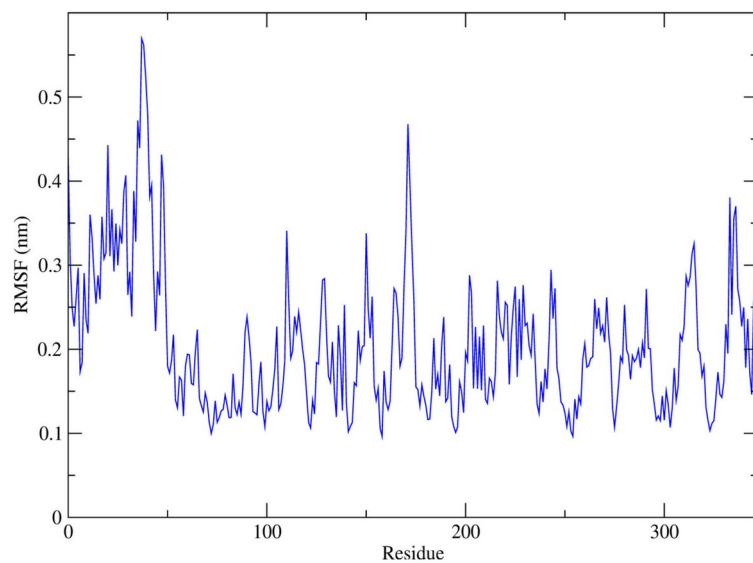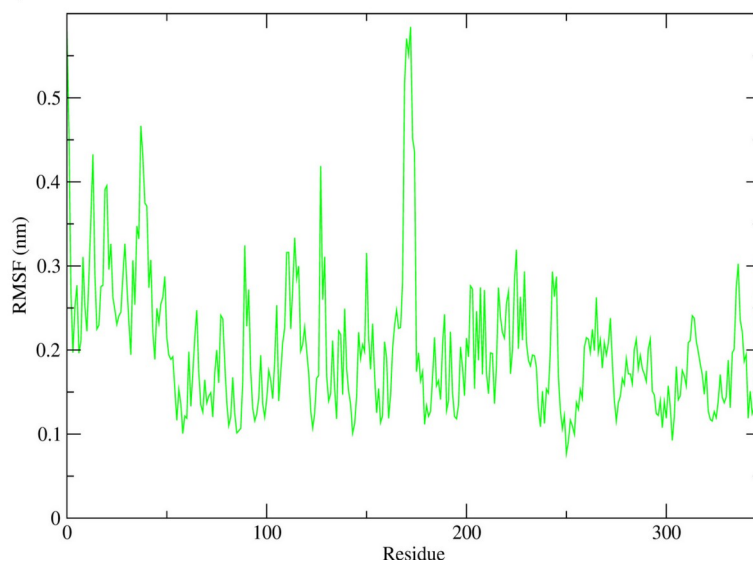

**Supplementary Figure S1:** RMSF of the Nsp15 residues towards the bioactive molecules :

(i)Nsp15-Barrigenol (Red) (ii)Nsp15-Kaempferol (Blue) (iii)Nsp15-Myricetin (Green)

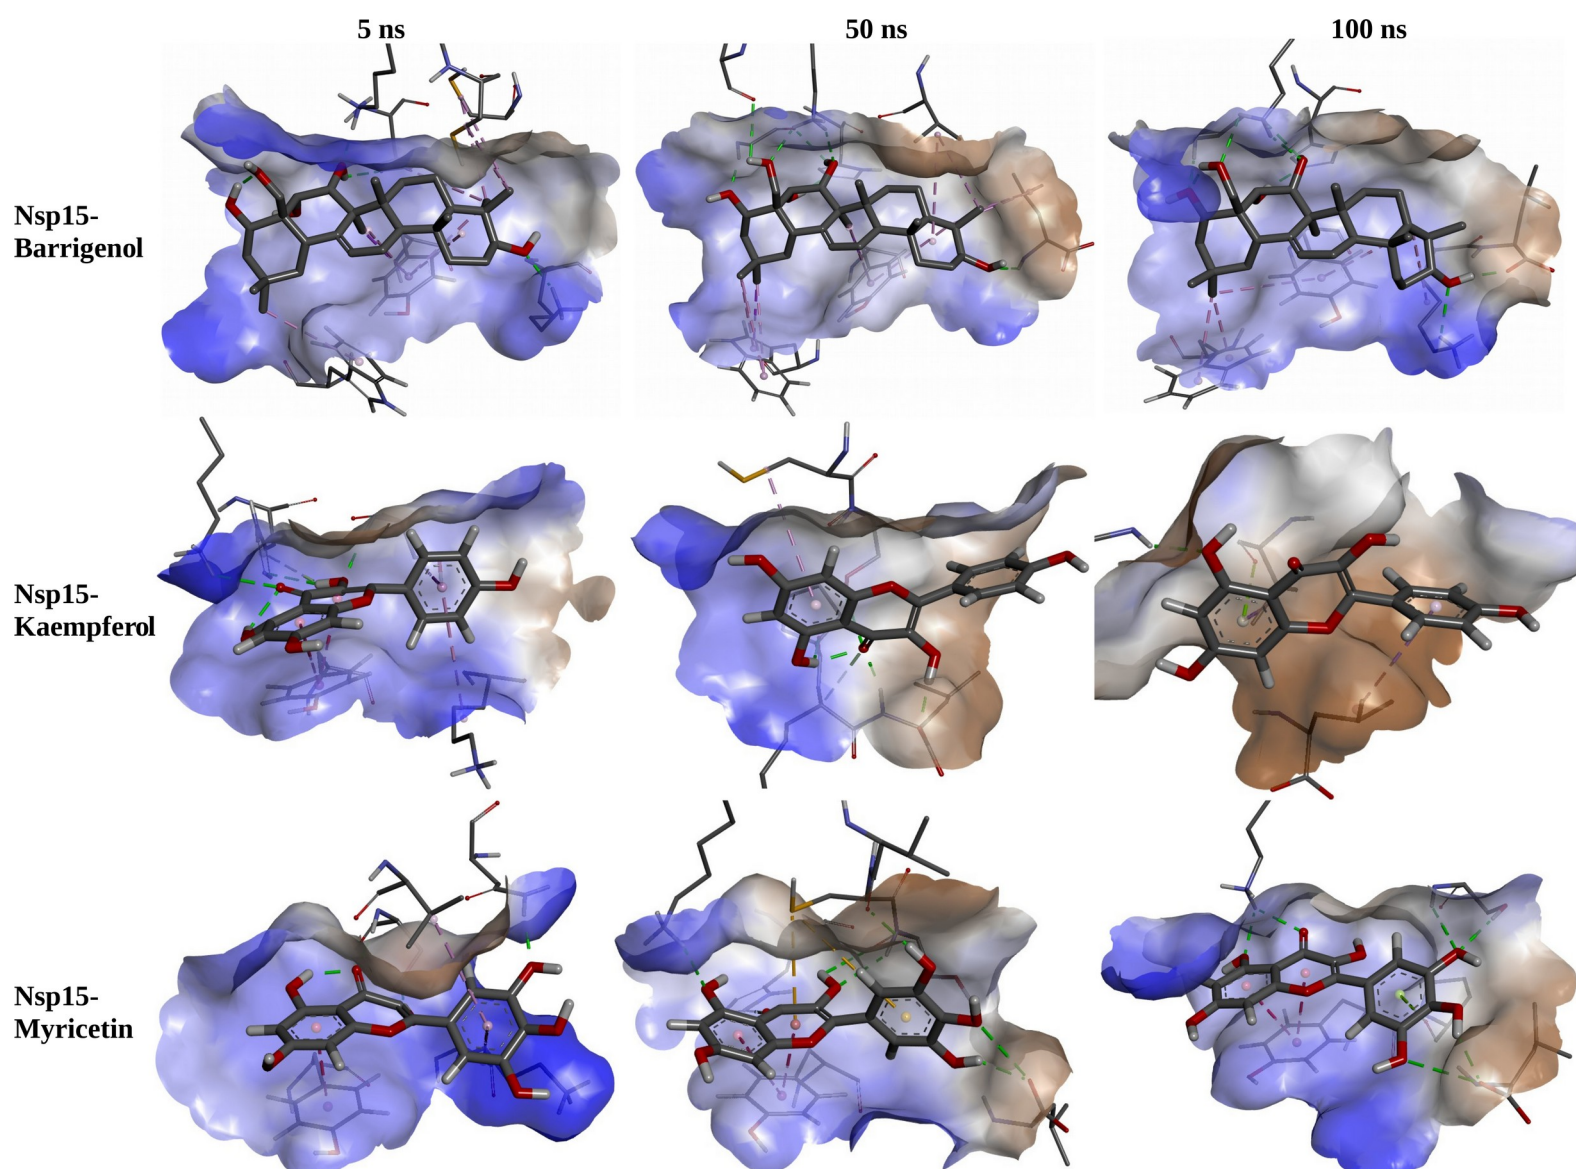

**Supplementary Figure S2:** Interactions pattern of the three bioactive molecules inside the active site of Nsp15 in 3D conformational space also showing the hydrophobic interaction surface at the beginning, middle, and end of MD-simulations visualized by Discovery studio.

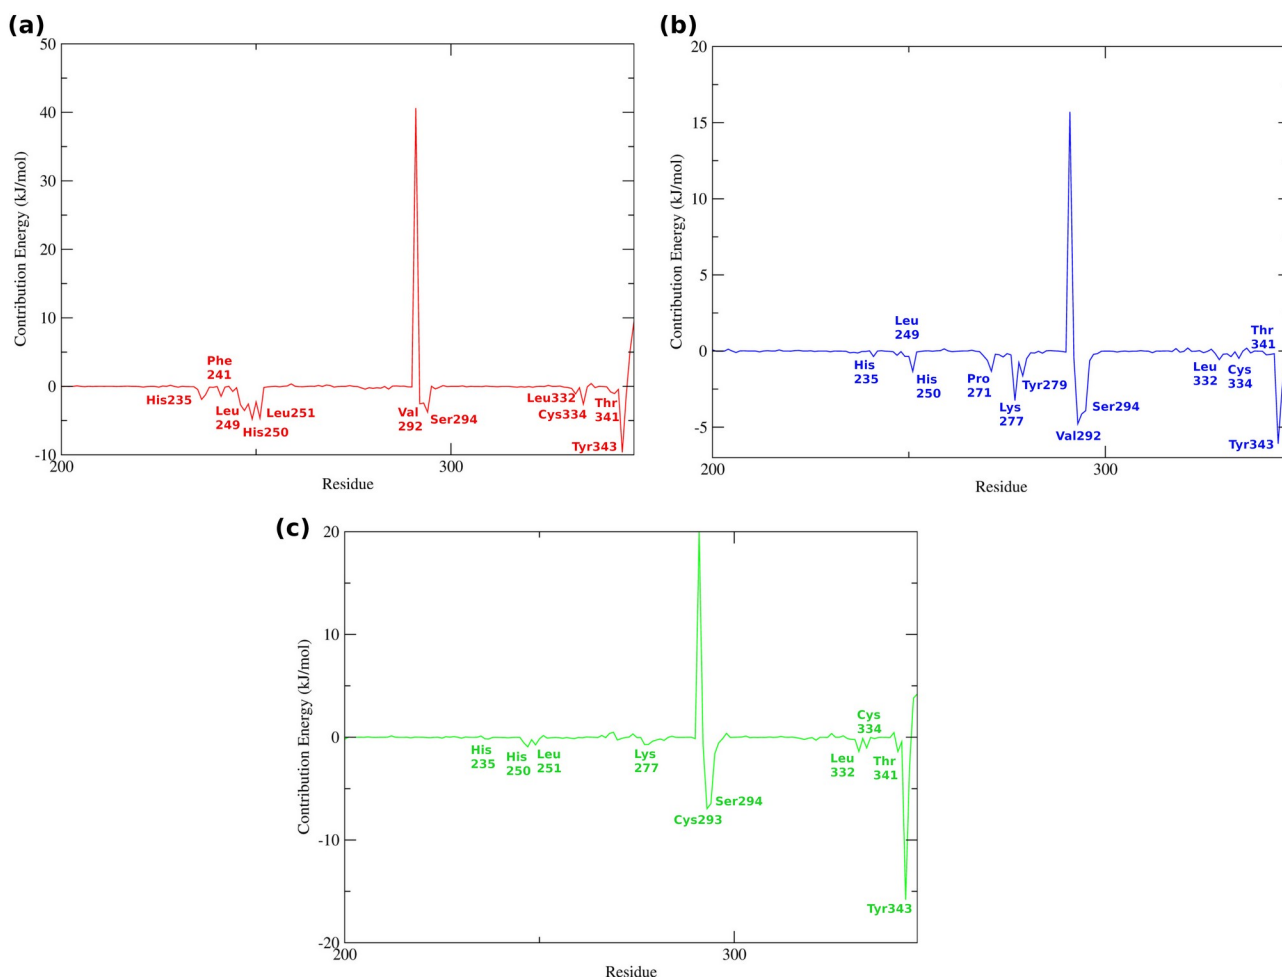

**Supplementary figure S3:** Graphical representation of per residue contribution energy of the active site of Nsp15 in complex with bioactives: (i) Nsp15-Barrigenol (Red) (ii) Nsp15-Kaempferol (Blue) (iii) Nsp15-Myricetin (Green)

**Supplementary Table 1:** 65 bioactive molecules depicting the total binding energies obtained after docking.

| <b>S. No.</b> | <b>Name</b>           | <b>Total Binding Energies</b> |
|---------------|-----------------------|-------------------------------|
| 1.            | Barrigenol            | -15.9                         |
| 2.            | Kaempferol            | -12.99                        |
| 3.            | Myricetin             | -11.9                         |
| 4.            | Theanine              | -11.78                        |
| 5.            | Methyl Salicylate     | -11.74                        |
| 6.            | Linalool Oxide        | -11.27                        |
| 7.            | Epicatechin           | -10.53                        |
| 8.            | Quercetin             | -10.37                        |
| 9.            | Apigenin              | -10                           |
| 10.           | Succinic Acid         | -9.88                         |
| 11.           | Coumaroyl Quinic Acid | -9.76                         |
| 12.           | Hexanal               | -9.22                         |
| 13.           | Catechin              | -9.07                         |
| 14.           | Epigallocatechin      | -9.07                         |
| 15.           | Linalool              | -8.87                         |
| 16.           | Vitexin               | -8.51                         |
| 17.           | Phenylethanol         | -7.45                         |
| 18.           | Epicatechin Gallate   | -7.41                         |
| 19.           | Geraniol              | -6.58                         |
| 20.           | Nerolidol             | -6.31                         |
| 21.           | Kaempferitrin         | -6.22                         |
| 22.           | Phenylacetaldehyde    | -5.9                          |
| 23.           | cis-3-Hexenol         | -5.26                         |
| 24.           | Theobromine           | -5.08                         |

|     |                              |       |
|-----|------------------------------|-------|
| 25. | Caffeine                     | -4.44 |
| 26. | trans-2-Hexenal              | -3.57 |
| 27. | Theophylline                 | -3.45 |
| 28. | Benzaldehyde                 | -3.33 |
| 29. | Epiafzelechin 3-O-gallate    | -2.52 |
| 30. | Vicenin                      | -2.46 |
| 31. | Barringtogenol               | -2.43 |
| 32. | Oxalic Acid                  | -2.43 |
| 33. | Epiafzelechin                | -2.29 |
| 34. | Quinic Acid                  | -2.2  |
| 35. | Theaflavic Acid              | -2.15 |
| 36. | Methylxanthine               | -2    |
| 37. | Ascorbic Acid                | -1.49 |
| 38. | Gallocatechin                | -1.08 |
| 39. | Pheophytin                   | -0.87 |
| 40. | Theaflavin                   | -0.65 |
| 41. | Xanthine                     | -0.61 |
| 42. | Epigallocatechin Gallate     | -0.55 |
| 43. | Isovitexin                   | -0.24 |
| 44. | Theasinensin E               | 0.28  |
| 45. | Rutin                        | 0.69  |
| 46. | Chlorogenic Acid             | 0.79  |
| 47. | Isoquercetin                 | 2.57  |
| 48. | Diphenylamine                | 3.89  |
| 49. | Epitheaflavic Acid 3-gallate | 4.34  |
| 50. | Saponarin                    | 4.4   |
| 51. | Epicatechin-3,5-di-O-gallate | 4.68  |

|     |                                   |                   |
|-----|-----------------------------------|-------------------|
| 52. | Epigallocatechin-3-O-p-coumarate  | 5.16              |
| 53. | Epigallocatechin-3,4-di-O-gallate | 6.01              |
| 54. | Epigallocatechin-3,5-di-O-gallate | 8.49              |
| 55. | Camelliagenin                     | 8.49              |
| 56. | Cryptoxanthin                     | 9.23              |
| 57. | Oolonghomobisflavan A             | No Pose Generated |
| 58. | Oolonghomobisflavan B             | No Pose Generated |
| 59. | Theasinensin D                    | No Pose Generated |
| 60. | Theaflavin-3'-O-Gallate           | No Pose Generated |
| 61. | Isotheaflavin                     | No Pose Generated |
| 62. | Theasinensin F                    | No Pose Generated |
| 63. | Proanthocyanidin                  | No Pose Generated |
| 64. | Myricitrin                        | No Pose Generated |
| 65. | Pheophorbide                      | No Pose Generated |

---

**Supplementary Table 2.** The interactions between the residues involved in the binding of the selected bioactive molecules with the Nsp15 of SARS-CoV2.

| Interactions               | Interacting residues with | Interacting residues with              | Interacting residues with              |
|----------------------------|---------------------------|----------------------------------------|----------------------------------------|
|                            | Barrigenol                | Kaempferol                             | Myricetin                              |
| Conventional Hydrogen bond | Lys290, His235            | His250, Lys290, Val292, His235, Thr341 | His250, Lys290, Val292, His235, Thr341 |
| Carbon Hydrogen bond       | Nil                       | His250, Lys290                         | His250, Lys290                         |
| Pi-Pi stacked              | Nil                       | Tyr343                                 | Tyr343                                 |
| Pi-alkyl/alkyl             | Val292, Tyr343            | Val292                                 | Val292                                 |

**Supplementary Table 3:** Observed contribution energies for the binding site residues of NSP15 towards the ligand molecules

| Ligands    | NSP-15  |         |         |         |          |
|------------|---------|---------|---------|---------|----------|
|            | His235  | His250  | Ser294  | Thr341  | Tyr343   |
| Barrigenol | -1.9074 | -1.9074 | -3.7616 | -1.0588 | -9.6295  |
| Kaempferol | -0.0871 | -1.3389 | -3.9235 | -0.2284 | -6.0896  |
| Myricetin  | -0.1470 | -0.1591 | -6.47   | -1.4008 | -15.8175 |
